# Supplementary material
Source: MDPI journal article supplement (https://www.mdpi.com/1424-8247/14/5/414)
Supplement: s1 [file s1]

Article

# Antimicrobial and immunomodulating activities of two endemic *Nepeta* species and their major iridoids isolated from natural sources

Neda Aničić<sup>1</sup>, Uroš Gašić<sup>1,\*</sup>, Feng Lu<sup>2</sup>, Ana Ćirić<sup>1</sup>, Marija Ivanov<sup>1</sup>, Bojan Jevtić<sup>3</sup>, Milena Dimitrijević<sup>4</sup>, Boban Anđelković<sup>5</sup>, Marijana Skorić<sup>1</sup>, Jasmina Nestorović Živković<sup>1</sup>, Yingle Mao<sup>2</sup>, Jia Liu<sup>2</sup>, Chunping Tang<sup>2</sup>, Marina Soković<sup>1</sup>, Yang Ye<sup>2</sup>, Danijela Mišić<sup>1,2,\*</sup>

- <sup>1</sup> Department of Plant Physiology, Institute for Biological Research "Siniša Stanković"- National Institute of Republic of Serbia, University of Belgrade, Bulevar despota Stefana 142, 11060 Belgrade, Serbia; neda.anicic@ibiss.bg.ac.rs (N.A.); rancic@ibiss.bg.ac.rs (A.Ć.); marija.smiljkovic@ibiss.bg.ac.rs (M.I.); mdevic@ibiss.bg.ac.rs (M.S.); jasmina.nestorovic@ibiss.bg.ac.rs (J.N.Ž.); mris@ibiss.bg.ac.rs (M.S.)
  - <sup>2</sup> State Key Laboratory of Drug Research and Department of Natural Product Chemistry, Shanghai Institute of Materia Medica, Chinese Academy of Sciences, 555 Zu-Chong-Zhi Road, Zhangjiang Hi-Tech Park, Shanghai 201203, People's Republic of China; fenglu@simmm.ac.cn (F.L.); maoyingle@simmm.ac.cn (Y.M.); jia.liu@simmm.ac.cn (J.L.); tangcp@simmm.ac.cn (C.T.); yye@simmm.ac.cn (Y.Y.)
  - <sup>3</sup> Department of Immunology, Institute for Biological Research "Siniša Stanković"- National Institute of Republic of Serbia, University of Belgrade, Bulevar despota Stefana 142, 11060 Belgrade, Serbia; bojanbh@gmail.com (B.J.)
  - <sup>4</sup> Center of Excellence for Green Technologies, Institute for Multidisciplinary Research, University of Belgrade, Kneza Višeslava 1, 11030 Belgrade, Serbia; milena.dimitrijevic@imsi.rs (M.D.)
  - <sup>5</sup> Faculty of Chemistry, University of Belgrade, P.O. Box 51, 11158, 11000 Belgrade, Serbia; aboban@chem.bg.ac.rs (B.A.)
- \* Correspondence: uros.gasic@ibiss.bg.ac.rs (U.G.); dmisic@ibiss.bg.ac.rs (D.M.); Tel.: +381112078385 (D.M.)

## Supplementary Figure captions

- Figure S1.** Structural characterization of *trans,cis*-NL (a) using NMR techniques: 1D (<sup>1</sup>H and <sup>13</sup>C) (b and c) and 2D (COSY, NOESY and HSQC) (d to f).
- Figure S2.** Structural characterization of *cis,trans*-NL (a) using NMR techniques: 1D (<sup>1</sup>H and <sup>13</sup>C) (b and c) and 2D (COSY and HSQC, respectively) (d and e);
- Figure S3.** Structural characterization of 1,5,9-epideoxyloganic acid (a), using NMR techniques: 1D (<sup>1</sup>H and <sup>13</sup>C) (b and c) and 2D (NOESY) (d).
- Figure S4.** Proposed structural formula and detailed fragmentation pathway of trihydroxycinnamoylquinic acid (a), boschnaloside (b), deoxyloganic acid pentoside (c), 3,4-dihydroxyphenethyl alcohol 4-*O*-hexoside (d).

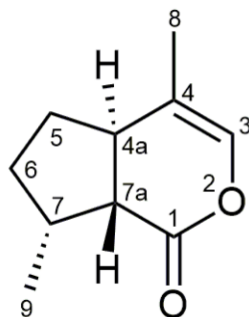

Figure S1a. Chemical structure of *trans, cis* nepetalactone.

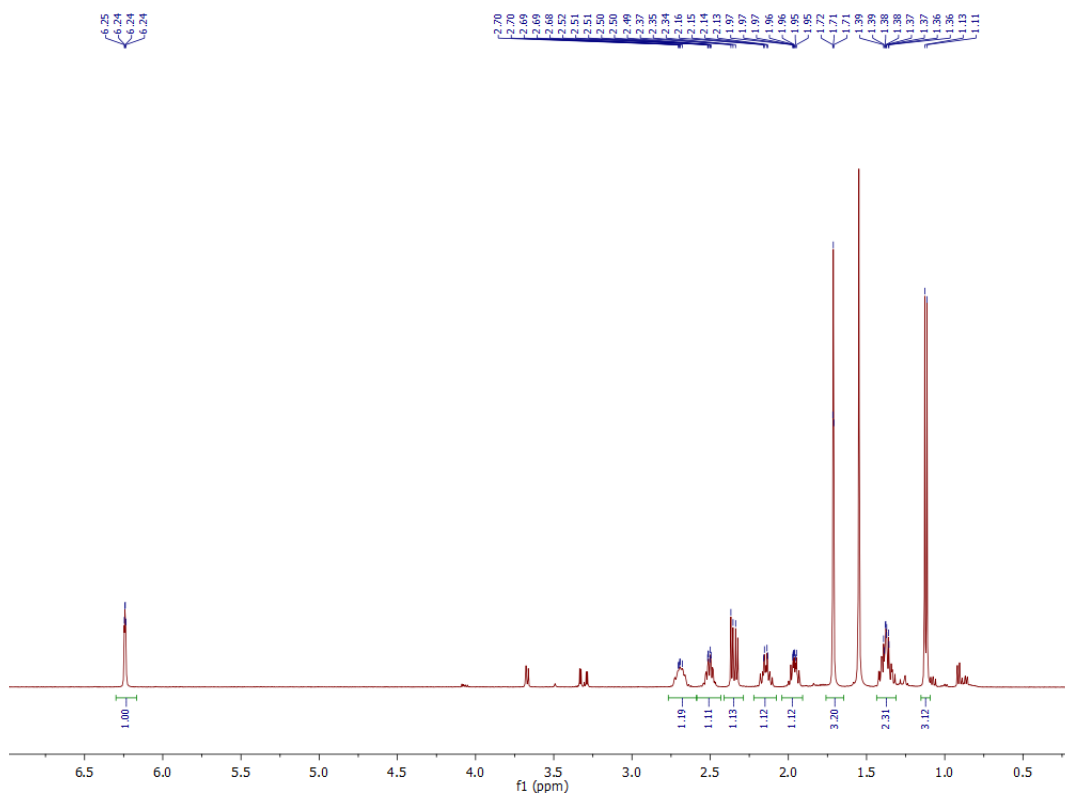

Figure S1b.  $^1\text{H-NMR}$  spectrum (500 MHz) of *trans, cis* nepetalactone in chloroform  $-d$ .

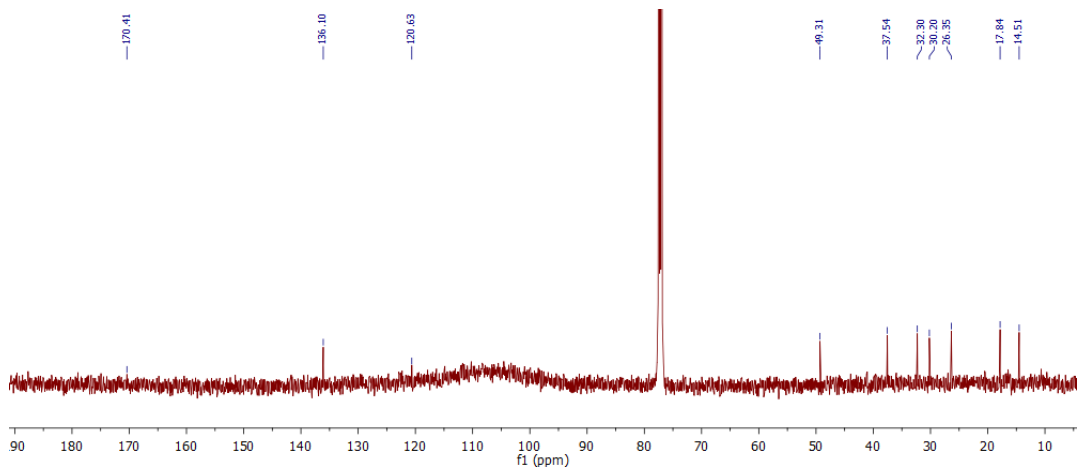

Figure S1c.  $^{13}\text{C}$ -NMR spectrum (125 MHz) of *trans, cis* nepetalactone in chloroform  $-d$ .

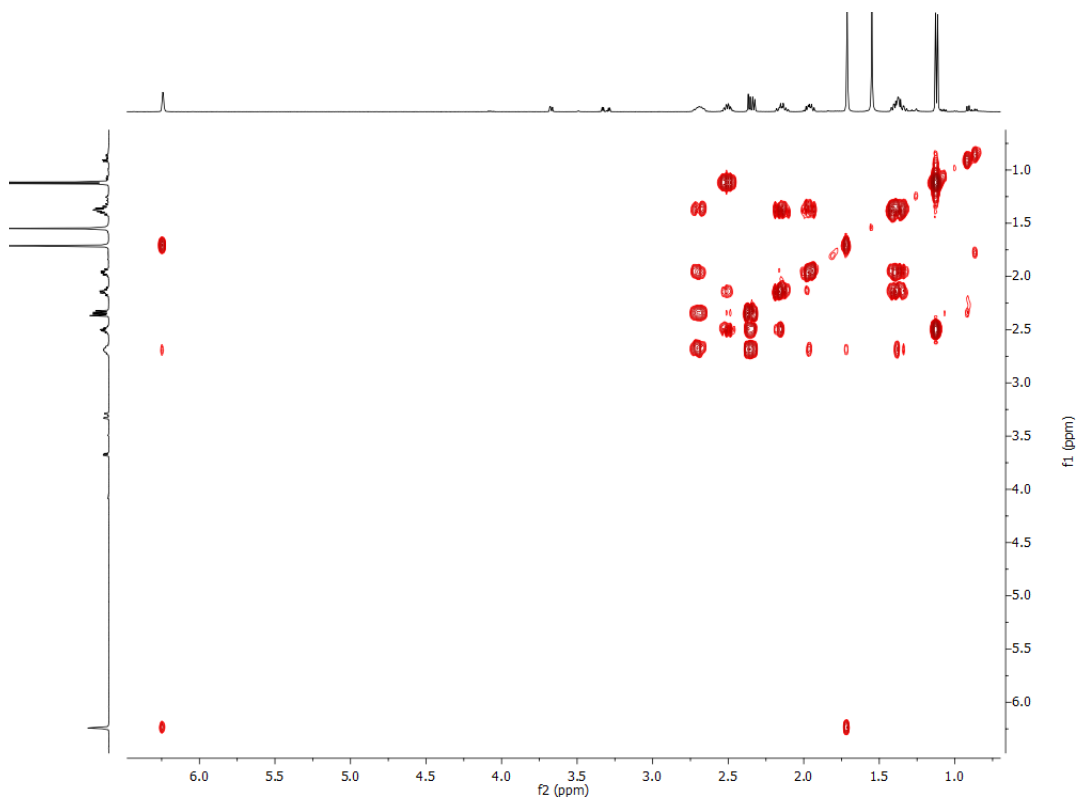

Figure S1d. COSY spectrum of *trans, cis* nepetalactone in chloroform  $-d$ .

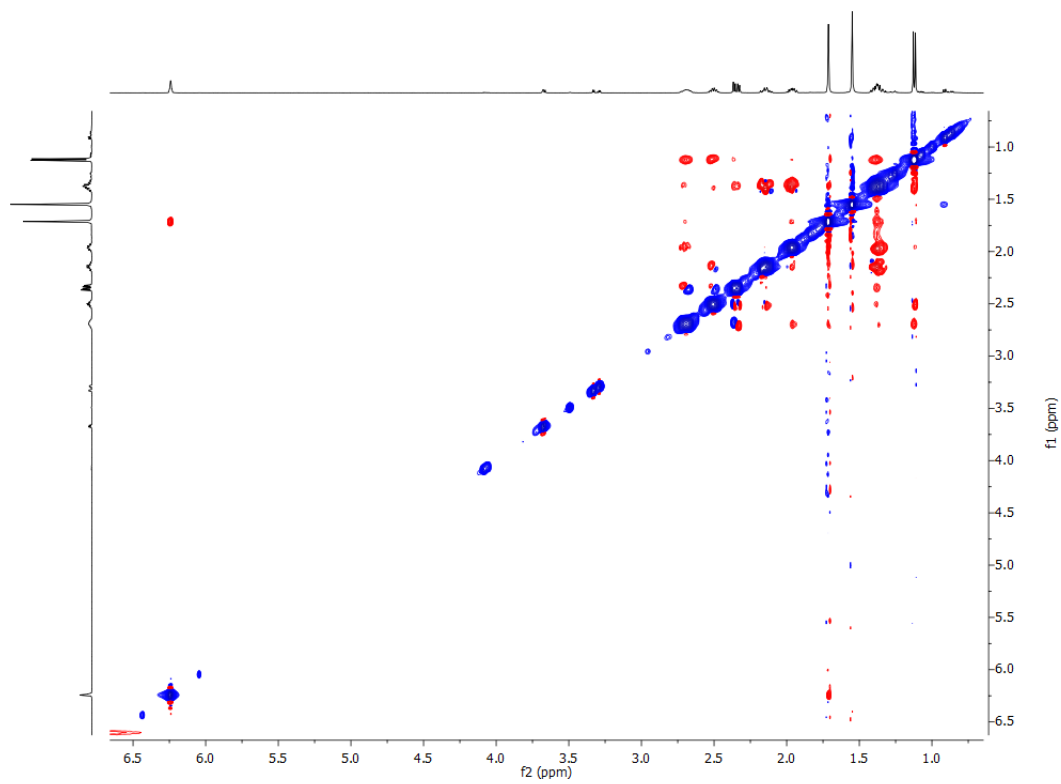

Figure S1e. NOESY spectrum of *trans, cis* nepetalactone in chloroform *-d*.

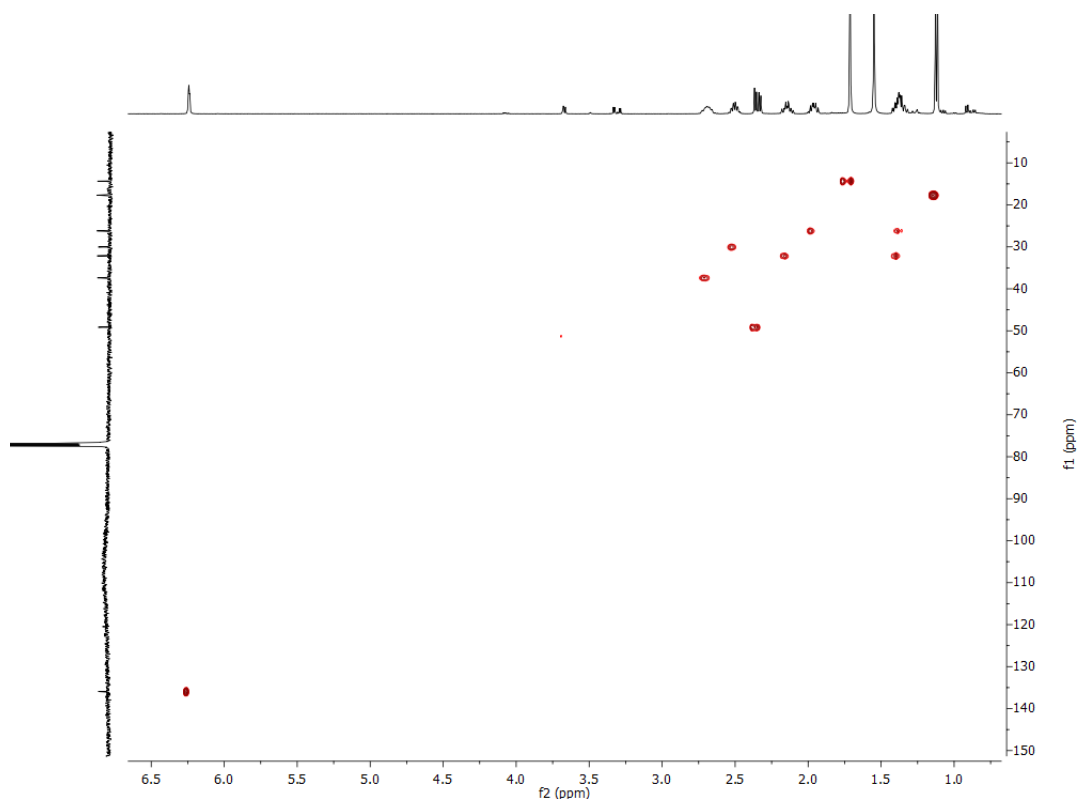

Figure S1f. HSQC spectrum of *trans, cis* nepetalactone in chloroform *-d*.

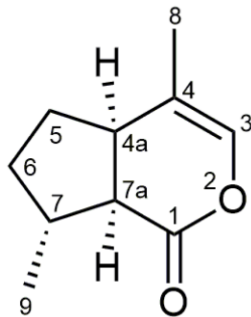

**Figure S2a.** Chemical structure of *cis,trans* nepetalactone.

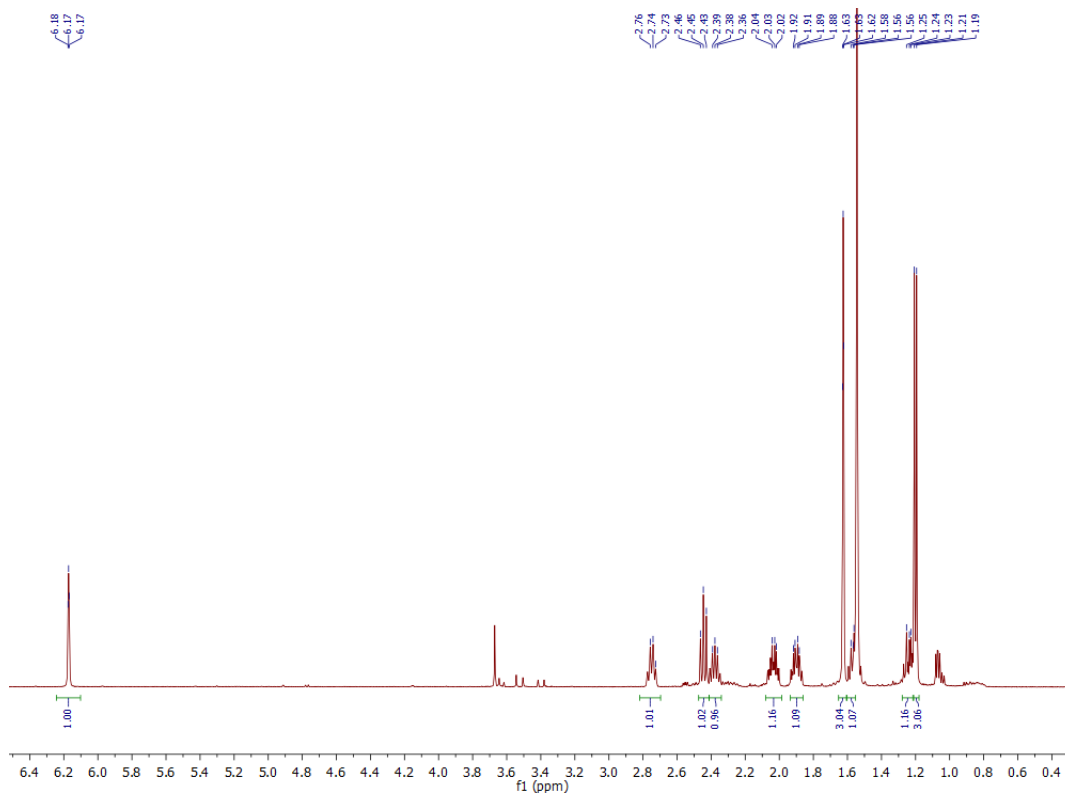

**Figure S2b.**  $^1\text{H-NMR}$  spectrum (500 MHz) of *cis,trans* nepetalactone in chloroform-*d*.

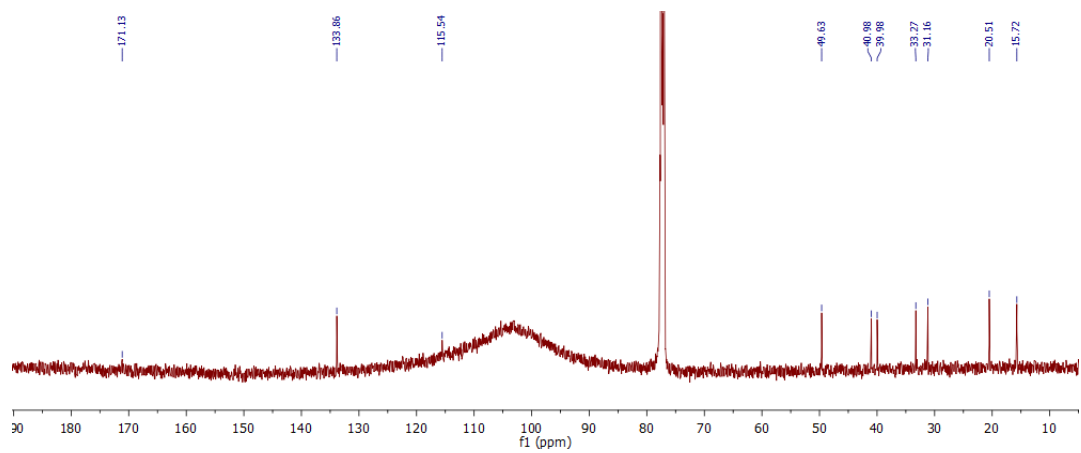

Figure S2c. <sup>13</sup>C-NMR spectrum (125 MHz) of *cis, trans* nepetalactone in chloroform *-d*.

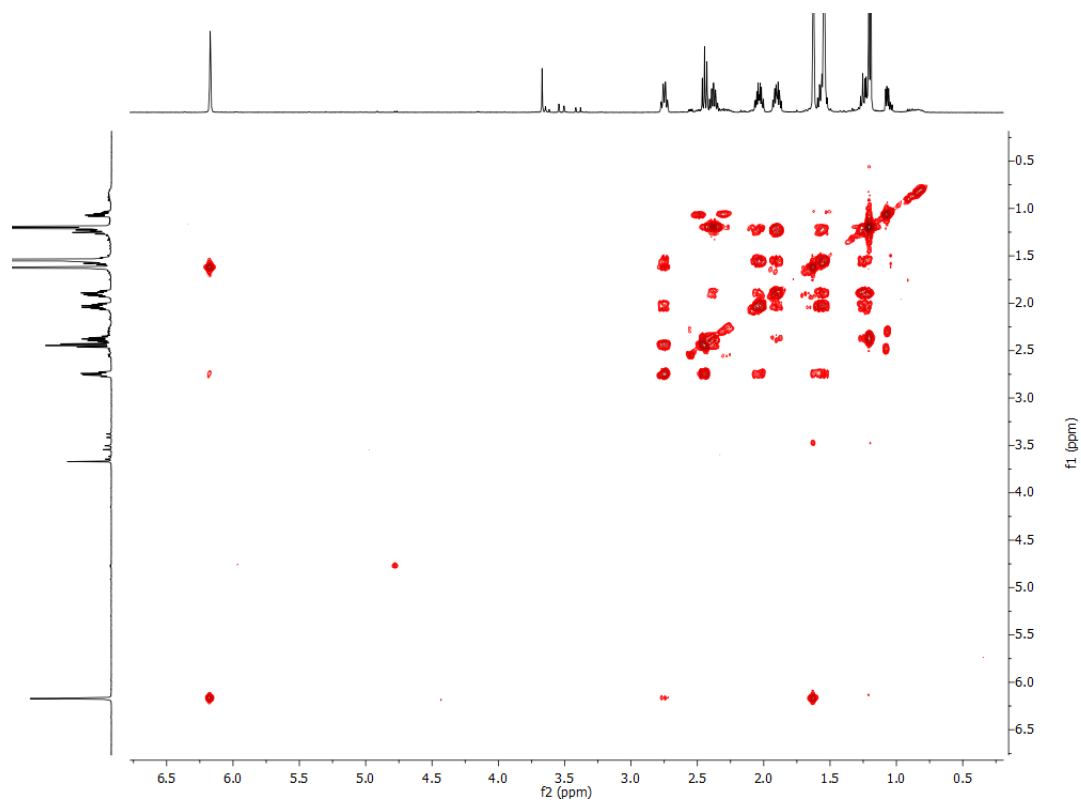

Figure S2d. H-H COSY spectrum of *cis, trans* nepetalactone in chloroform *-d*.

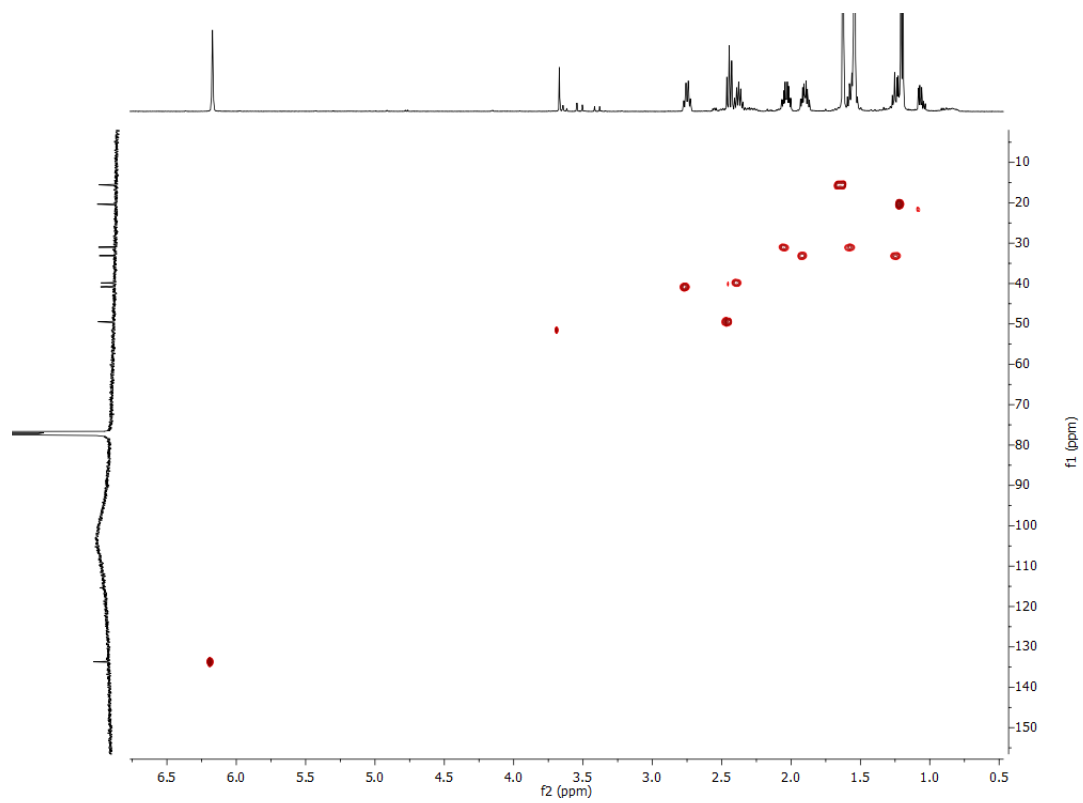

Figure S2e. HSQC spectrum of *cis, trans* nepetalactone in chloroform *-d*.

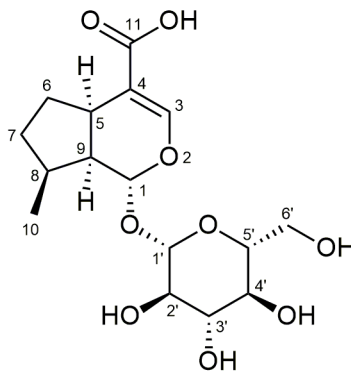

**Figure S3a.** Chemical structure of 1,5,9-epideoxyloganic acid.

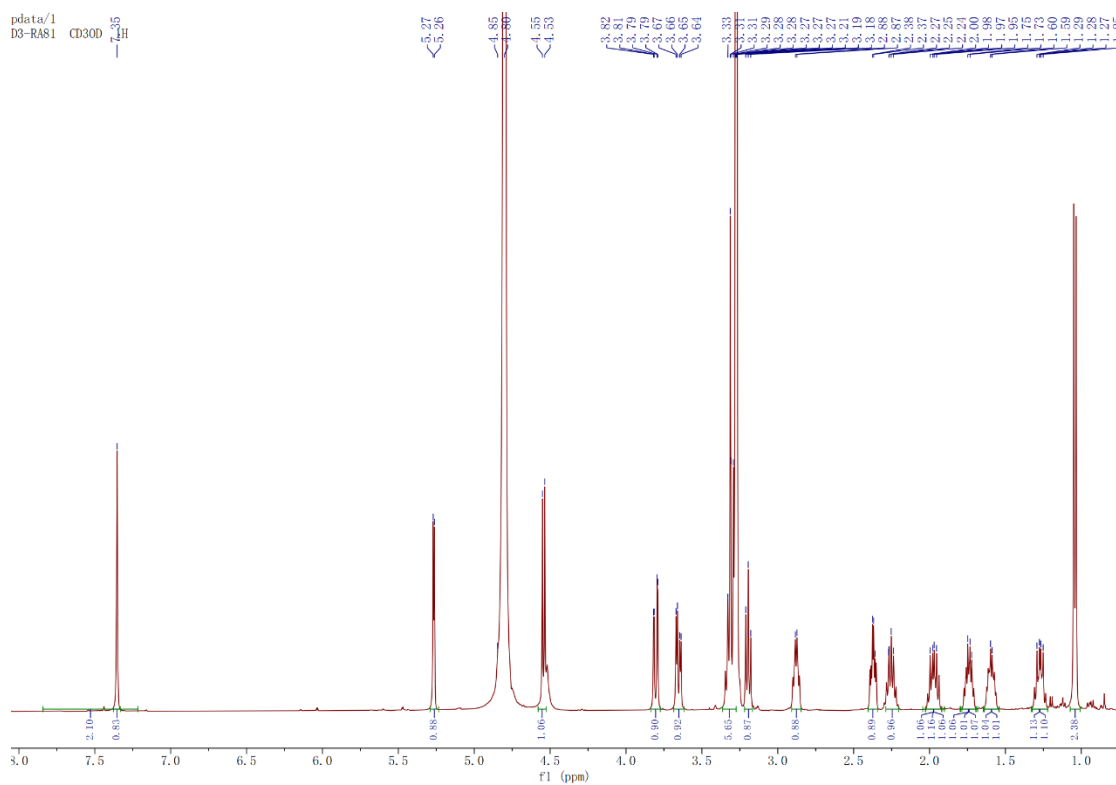

**Figure S3b.**  $^1\text{H-NMR}$  spectrum (500 MHz) of 1,5,9-epideoxyloganic acid in methanol- $d_4$



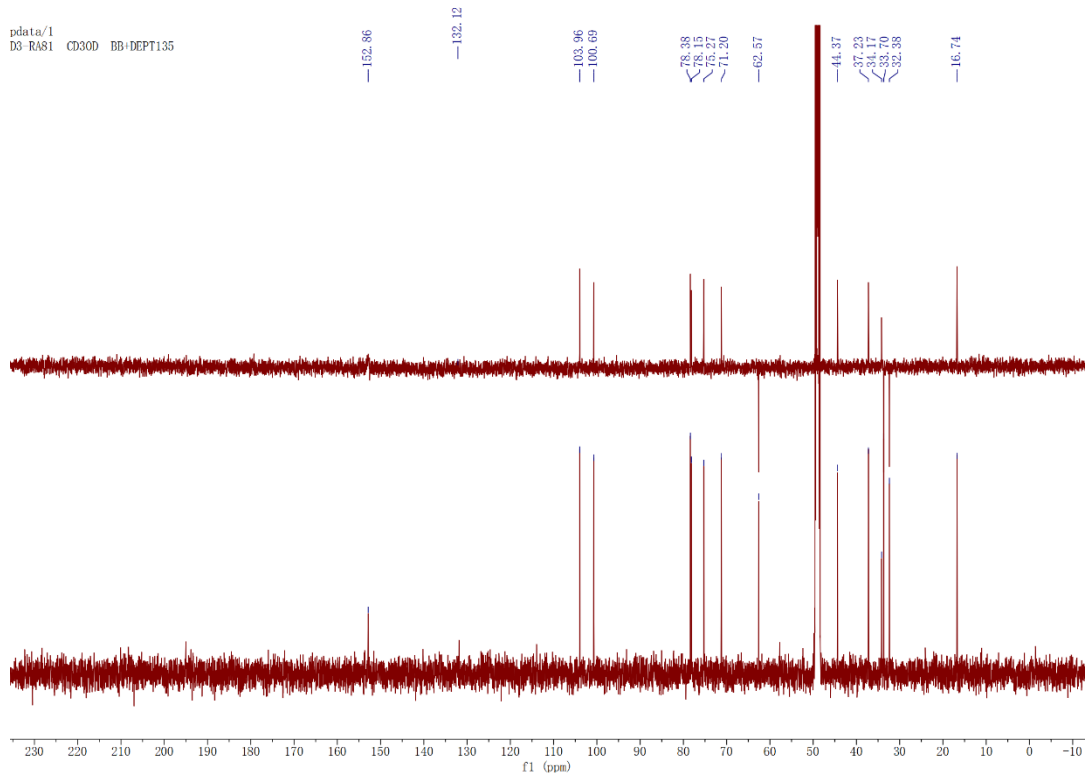

Figure S3c.  $^{13}\text{C}$ -NMR spectrum (125 MHz) of 1,5,9-epideoxyloganic acid in methanol- $d_4$

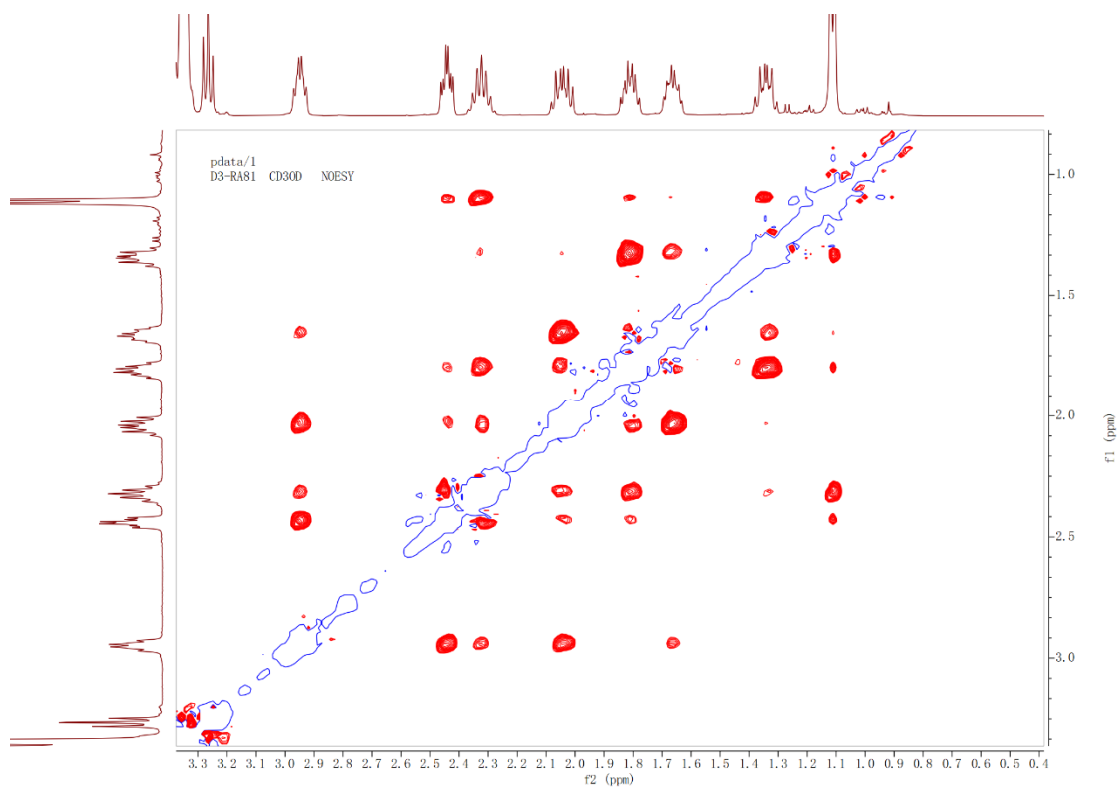

Figure S3d. NOESY spectrum (500 MHz) of 1,5,9-epideoxyloganic acid in methanol- $d_4$

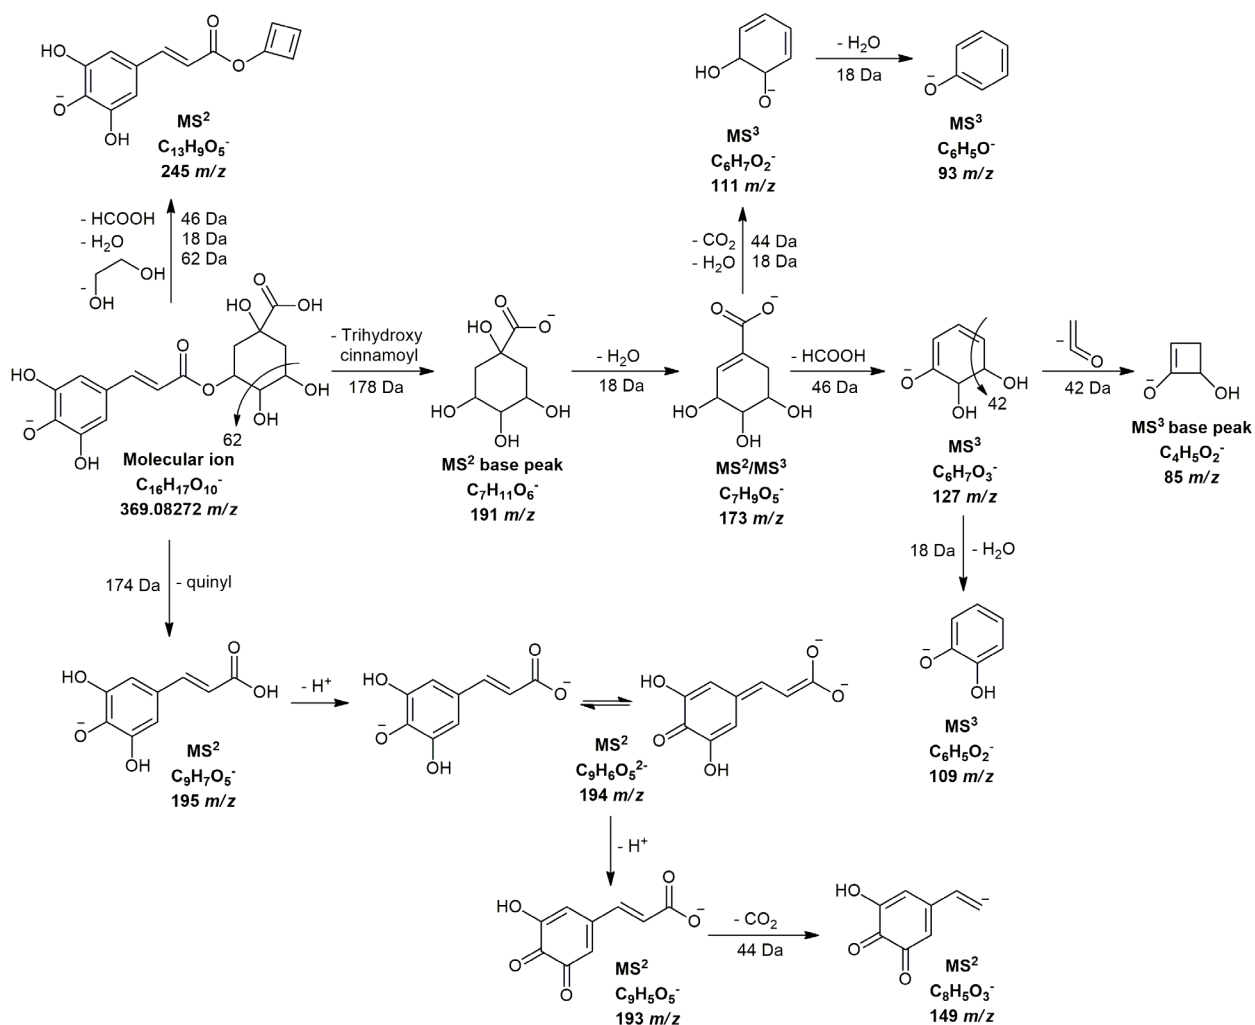

**Figure S4a.** Proposed structural formula of trihydroxycinnamoylquinic acid (compound 8), as well as its detailed fragmentation pathway.

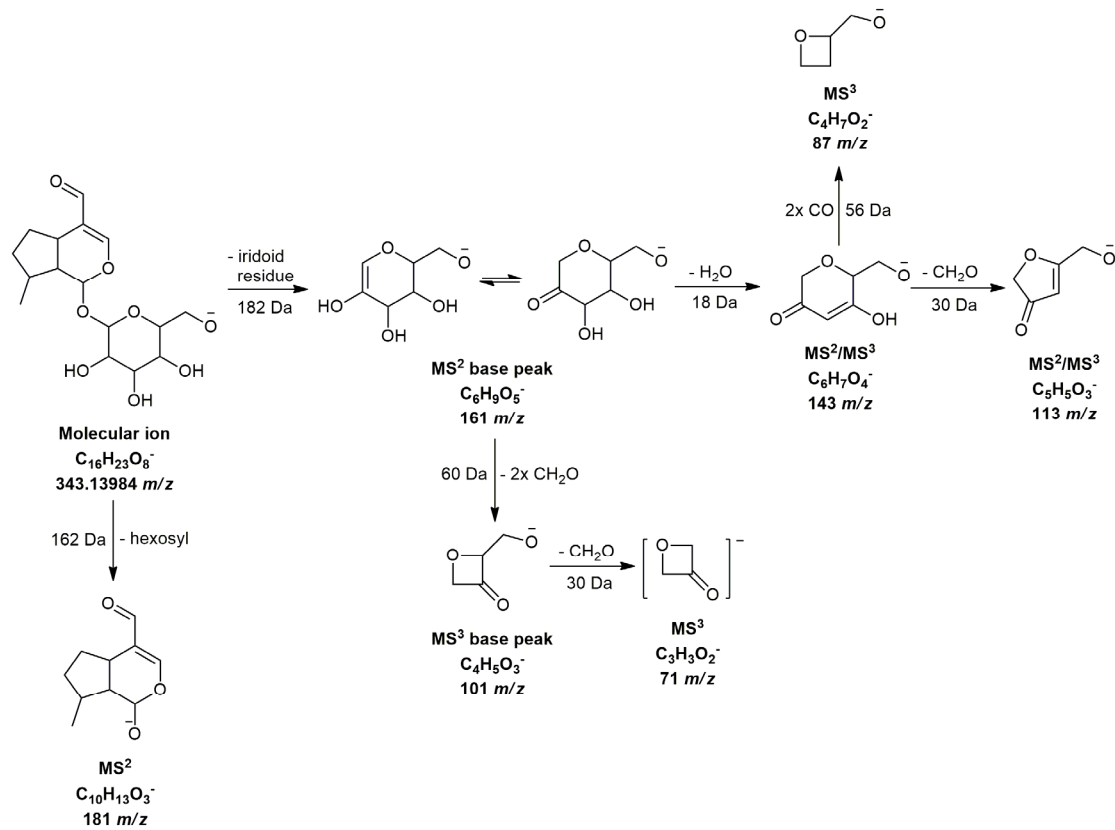

**Figure S4b.** Proposed fragmentation pathway of boschnaloside (compound 42).

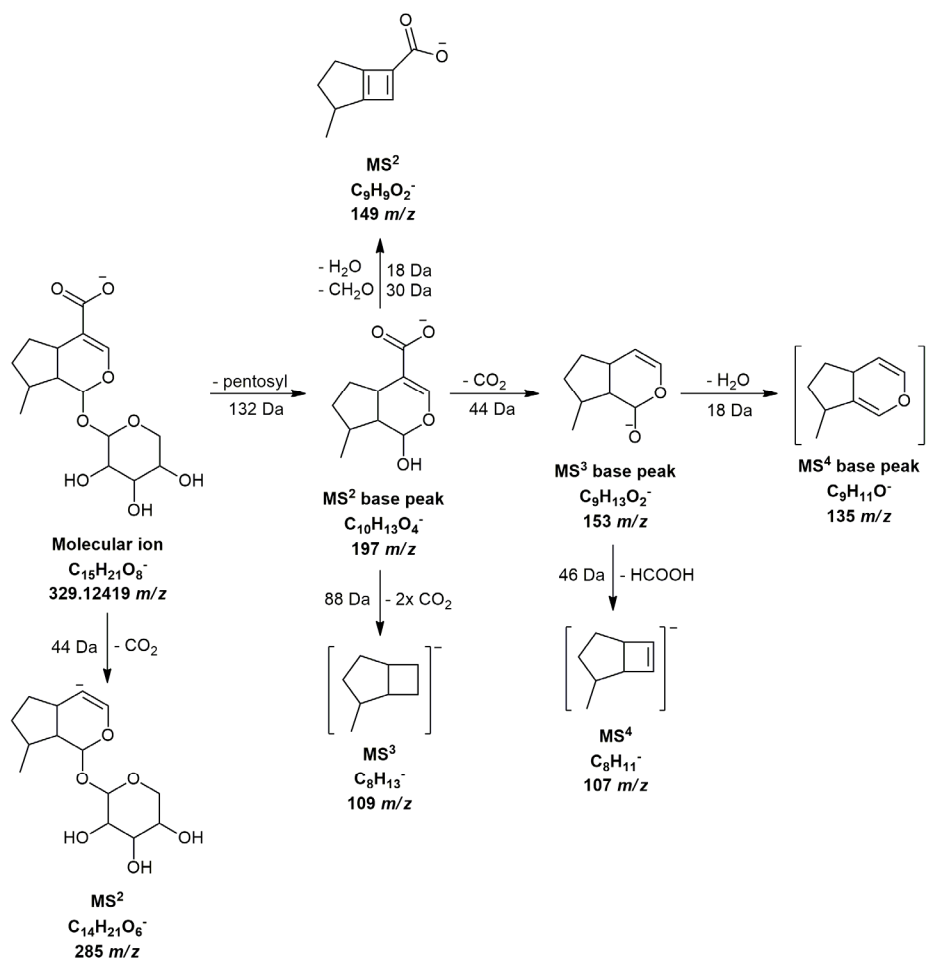

**Figure S4c.** Proposed structure and detailed fragmentation pathway deoxyloganetic acid pentoside (compound 43).

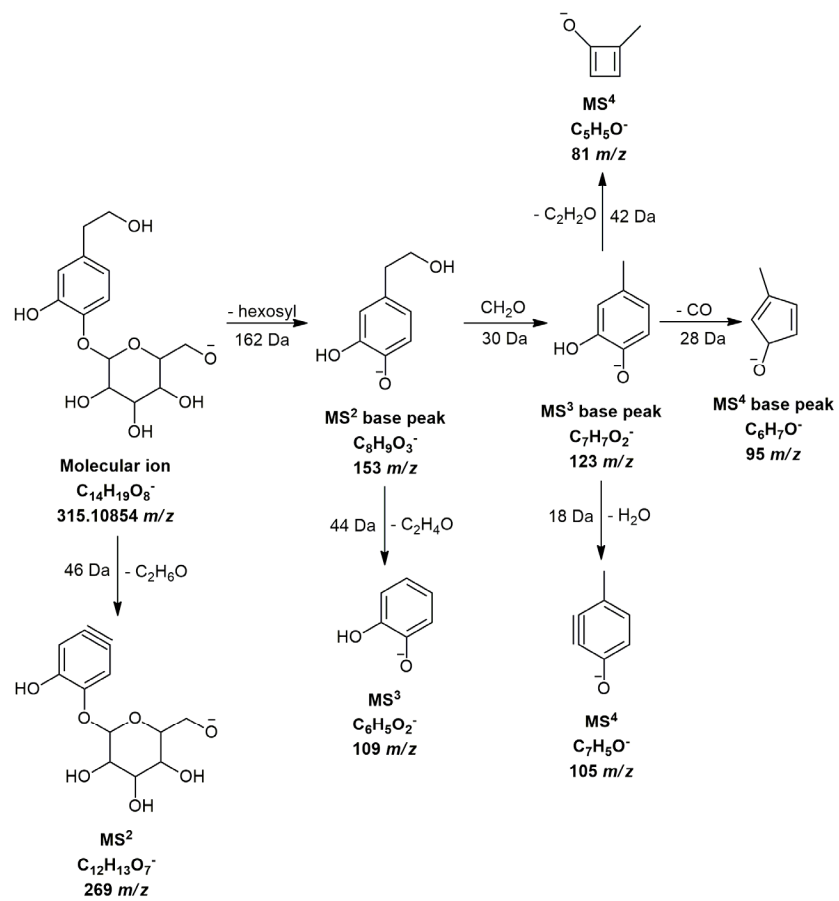

**Figure S4d.** Fragmentation pathway of 3,4-dihydroxyphenethyl alcohol 4-*O*-hexoside (compound 47).
